# Supplementary material for: H7N7 viral infection elicits pronounced, sex-specific neuroinflammatory responses in vitro
Source: Frontiers journal article supplement (doi:10.3389/fncel.2024.1444876), 2024-08-07
Supplement: Data_Sheet_1.pdf [file Data_Sheet_1.pdf]

## Supplementary Material

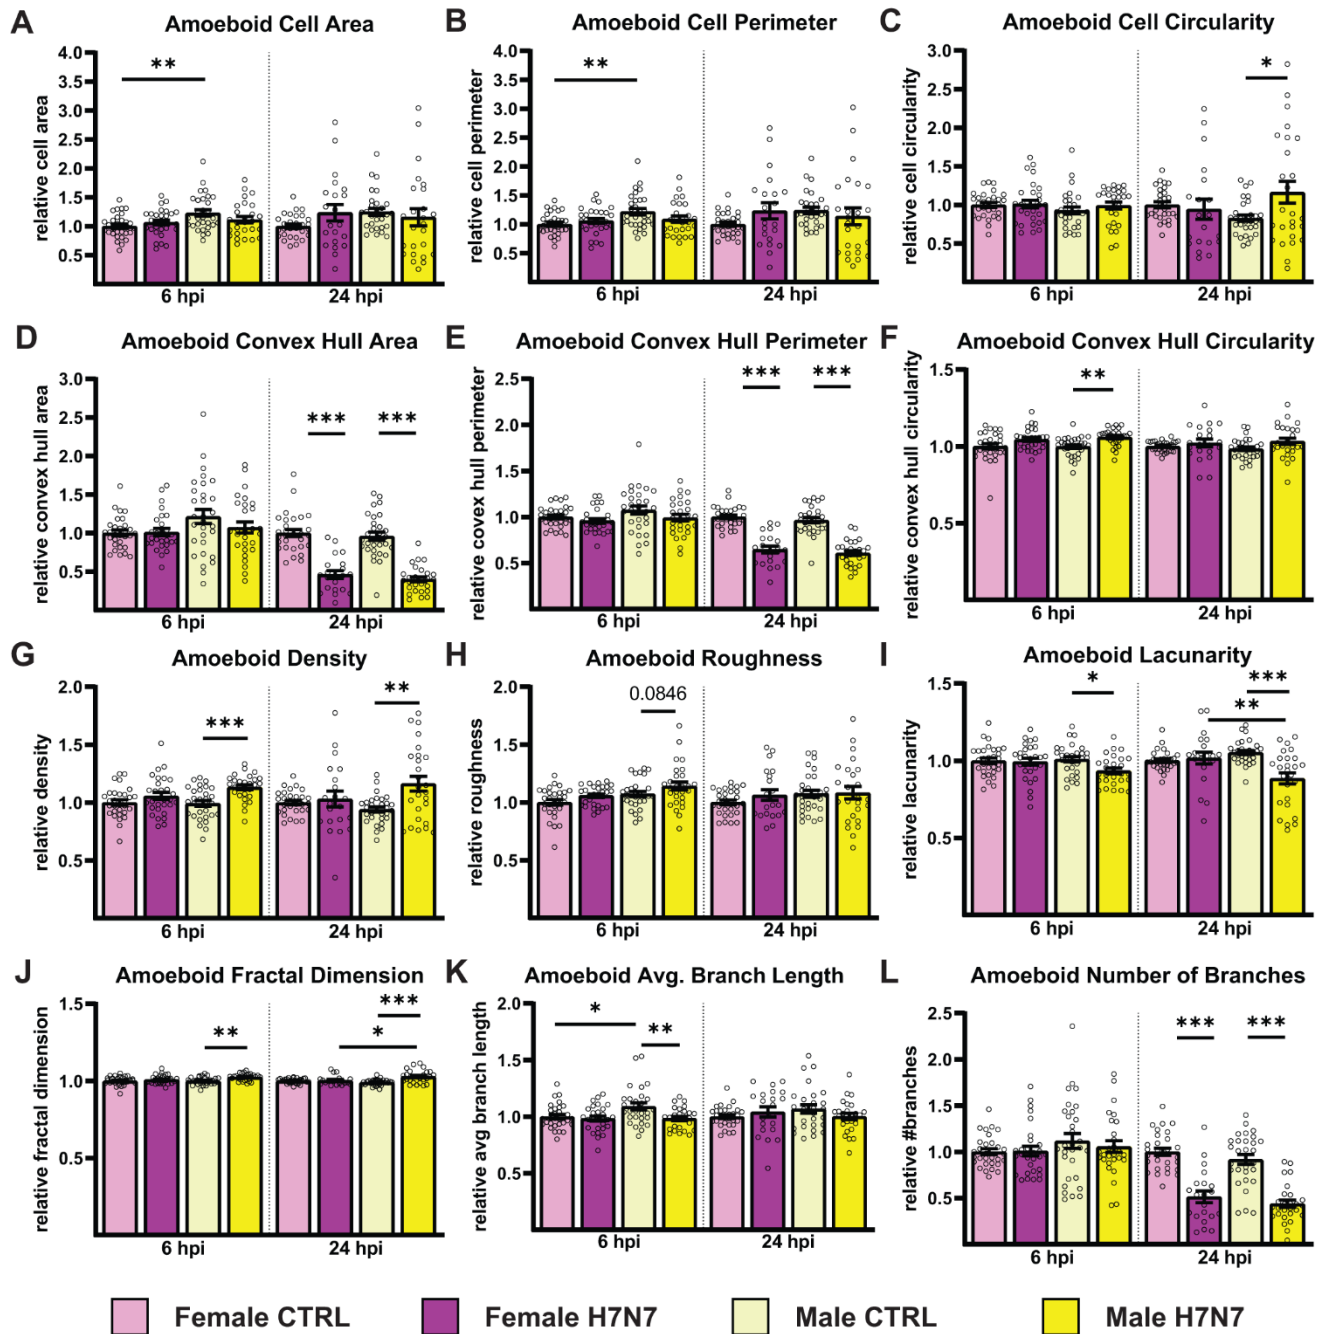

**Supplementary Figure 1.** Morphological characteristics of amoeboid-shaped microglia in female- and male-derived primary cultures after infection with influenza A/Seal/Mass/1/80 rSC35M (H7N7) virus. The following morphological characteristics were investigated: (A) cell area, (B) cell perimeter, (C) cell circularity, (D) convex hull area, (E) convex hull perimeter, (F) convex hull circularity, (G) density, (H) roughness, (I) lacunarity, (J) fractal dimension, (K) average branch length, (L) number of branches. Number of experiments, N = 3, n = 10 images per group and cell preparation round. Data are

presented as mean  $\pm$  SEM and were analyzed by two-way ANOVA followed by post hoc Tukey test. \* $p < 0.05$ , \*\* $p < 0.01$  and \*\*\* $p < 0.001$ .

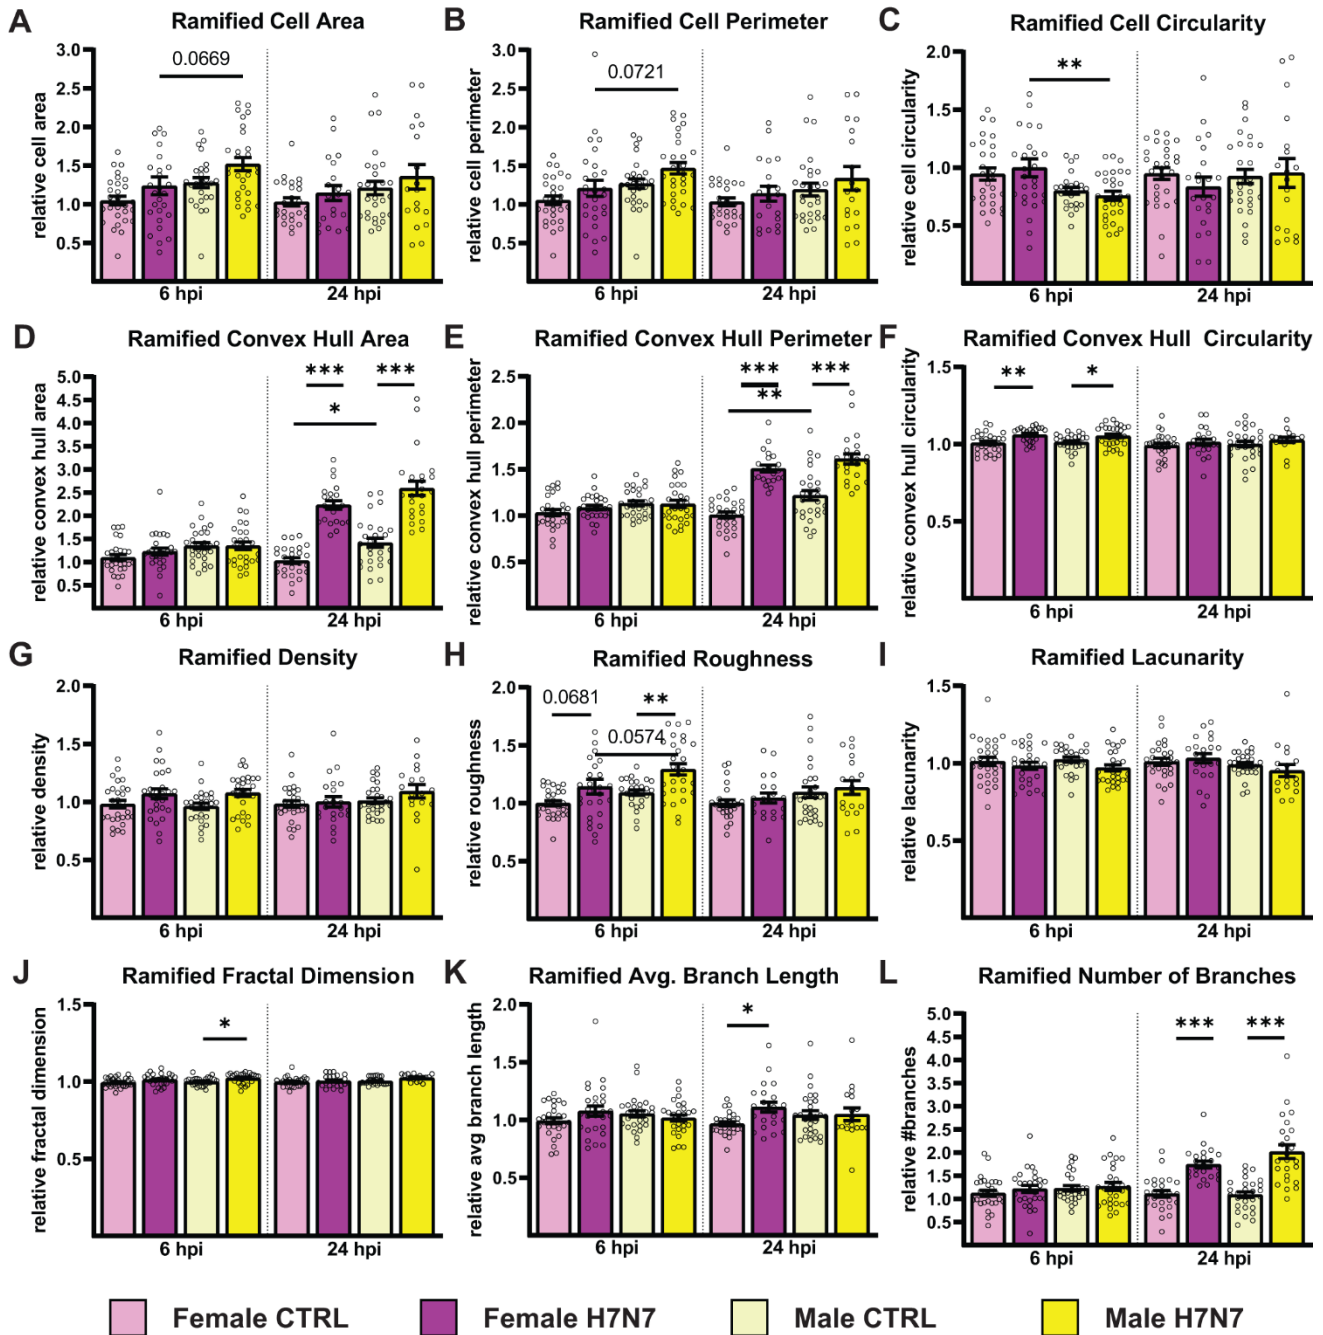

**Supplementary Figure 2.** Morphological characteristics of (hyper-)ramified microglia in female-and male-derived primary cultures after infection with influenza A/Seal/Mass/1/80 rSC35M (H7N7) virus. The following morphological characteristics were investigated: (A) cell area, (B) cell perimeter, (C) cell circularity, (D) convex hull area, (E) convex hull perimeter, (F) convex hull circularity, (G) density, (H) roughness, (I) lacunarity, (J) fractal dimension, (K) average branch length, (L) number of

branches. Number of experiments,  $N = 3$ ,  $n = 10$  images per group and cell preparation round. Data are presented as  $\text{mean} \pm \text{SEM}$  and were analyzed by two-way ANOVA followed by post hoc Tukey test.  $*p < 0.05$ ,  $**p < 0.01$  and  $***p < 0.001$ .

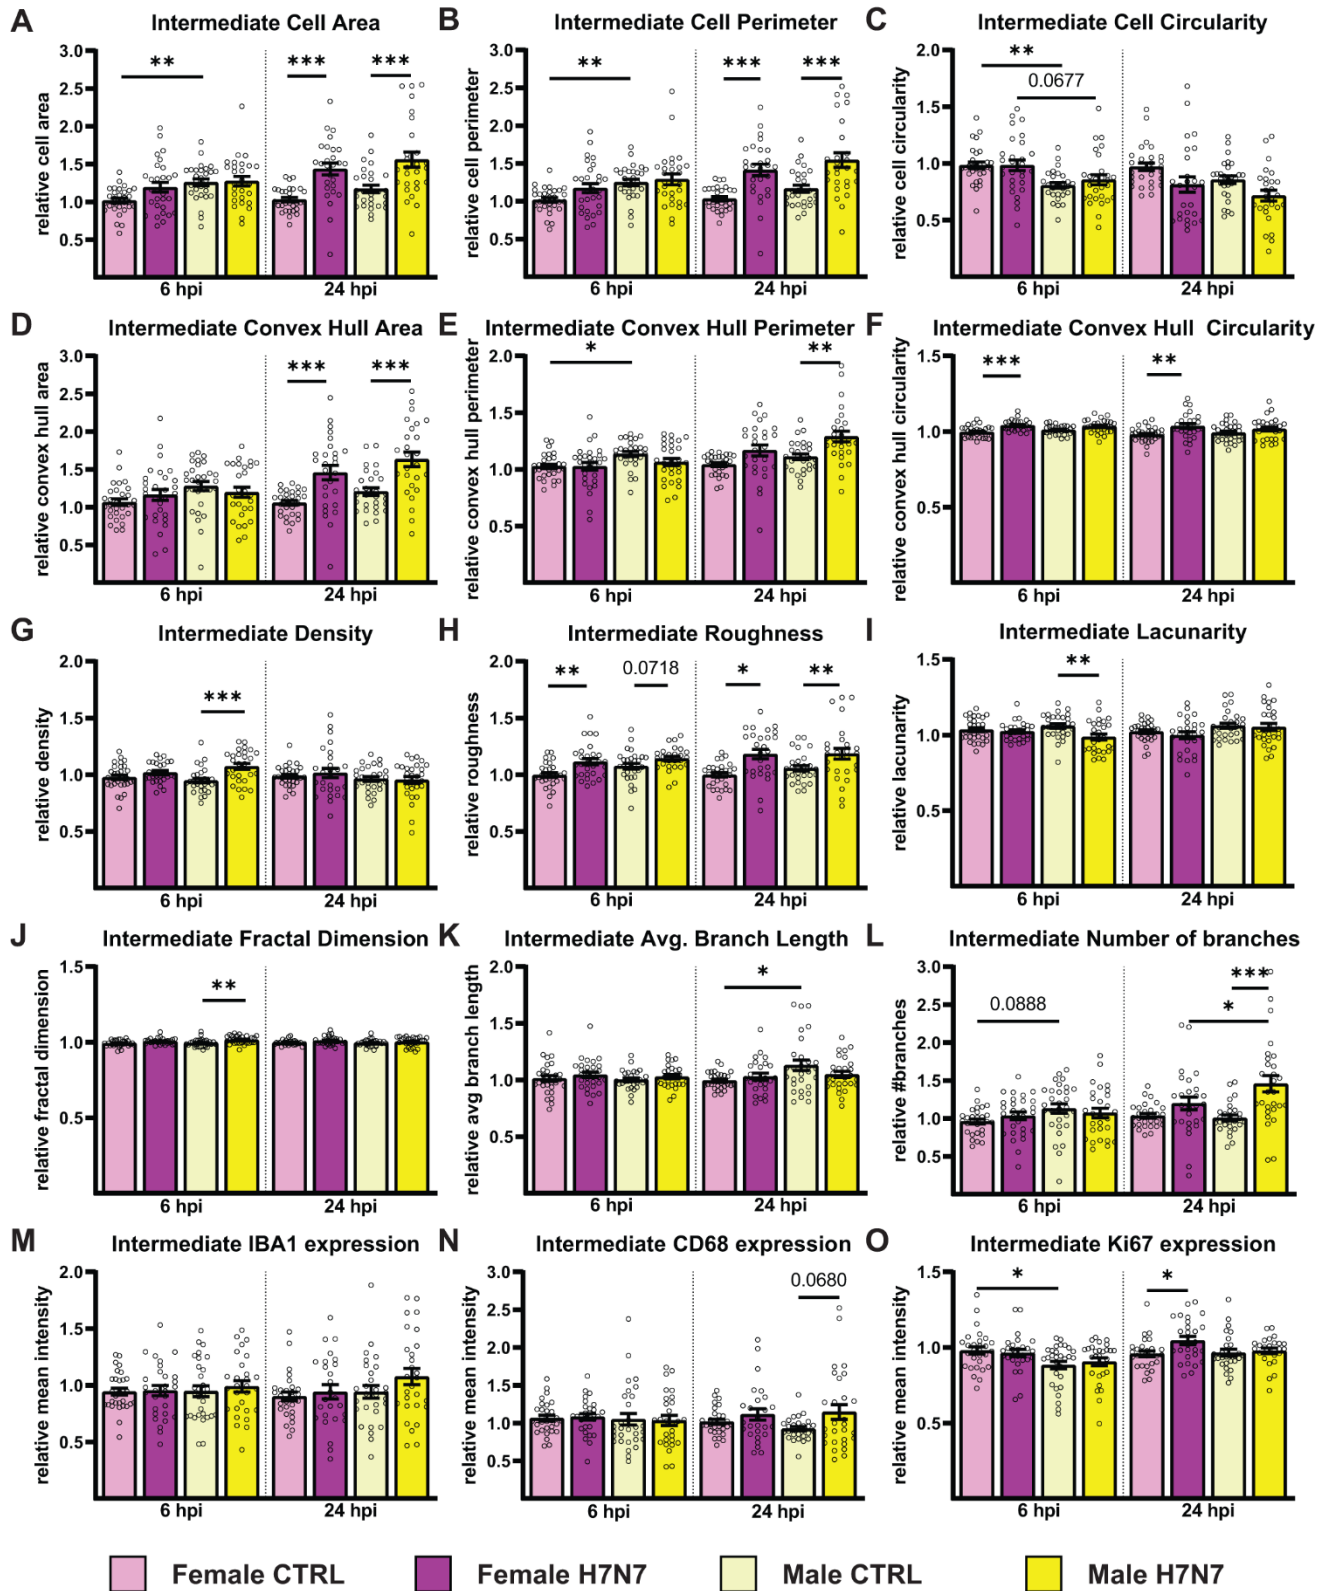

**Supplementary Figure 3.** Morphological characteristics of intermediate microglia in female- and male-derived primary cultures after infection with influenza A/Seal/Mass/1/80 rSC35M (H7N7) virus. The following morphological characteristics were investigated: (A) cell area, (B) cell perimeter, (C)

cell circularity, **(D)** convex hull area, **(E)** convex hull perimeter, **(F)** convex hull circularity, **(G)** density, **(H)** roughness, **(I)** lacunarity, **(J)** fractal dimension, **(K)** average branch length, **(L)** number of branches. Number of experiments,  $N = 3$ ,  $n = 10$  images per group and cell preparation round. Data are presented as mean  $\pm$  SEM and were analyzed by two-way ANOVA followed by post hoc Tukey test. \* $p < 0.05$ , \*\* $p < 0.01$  and \*\*\* $p < 0.001$ .



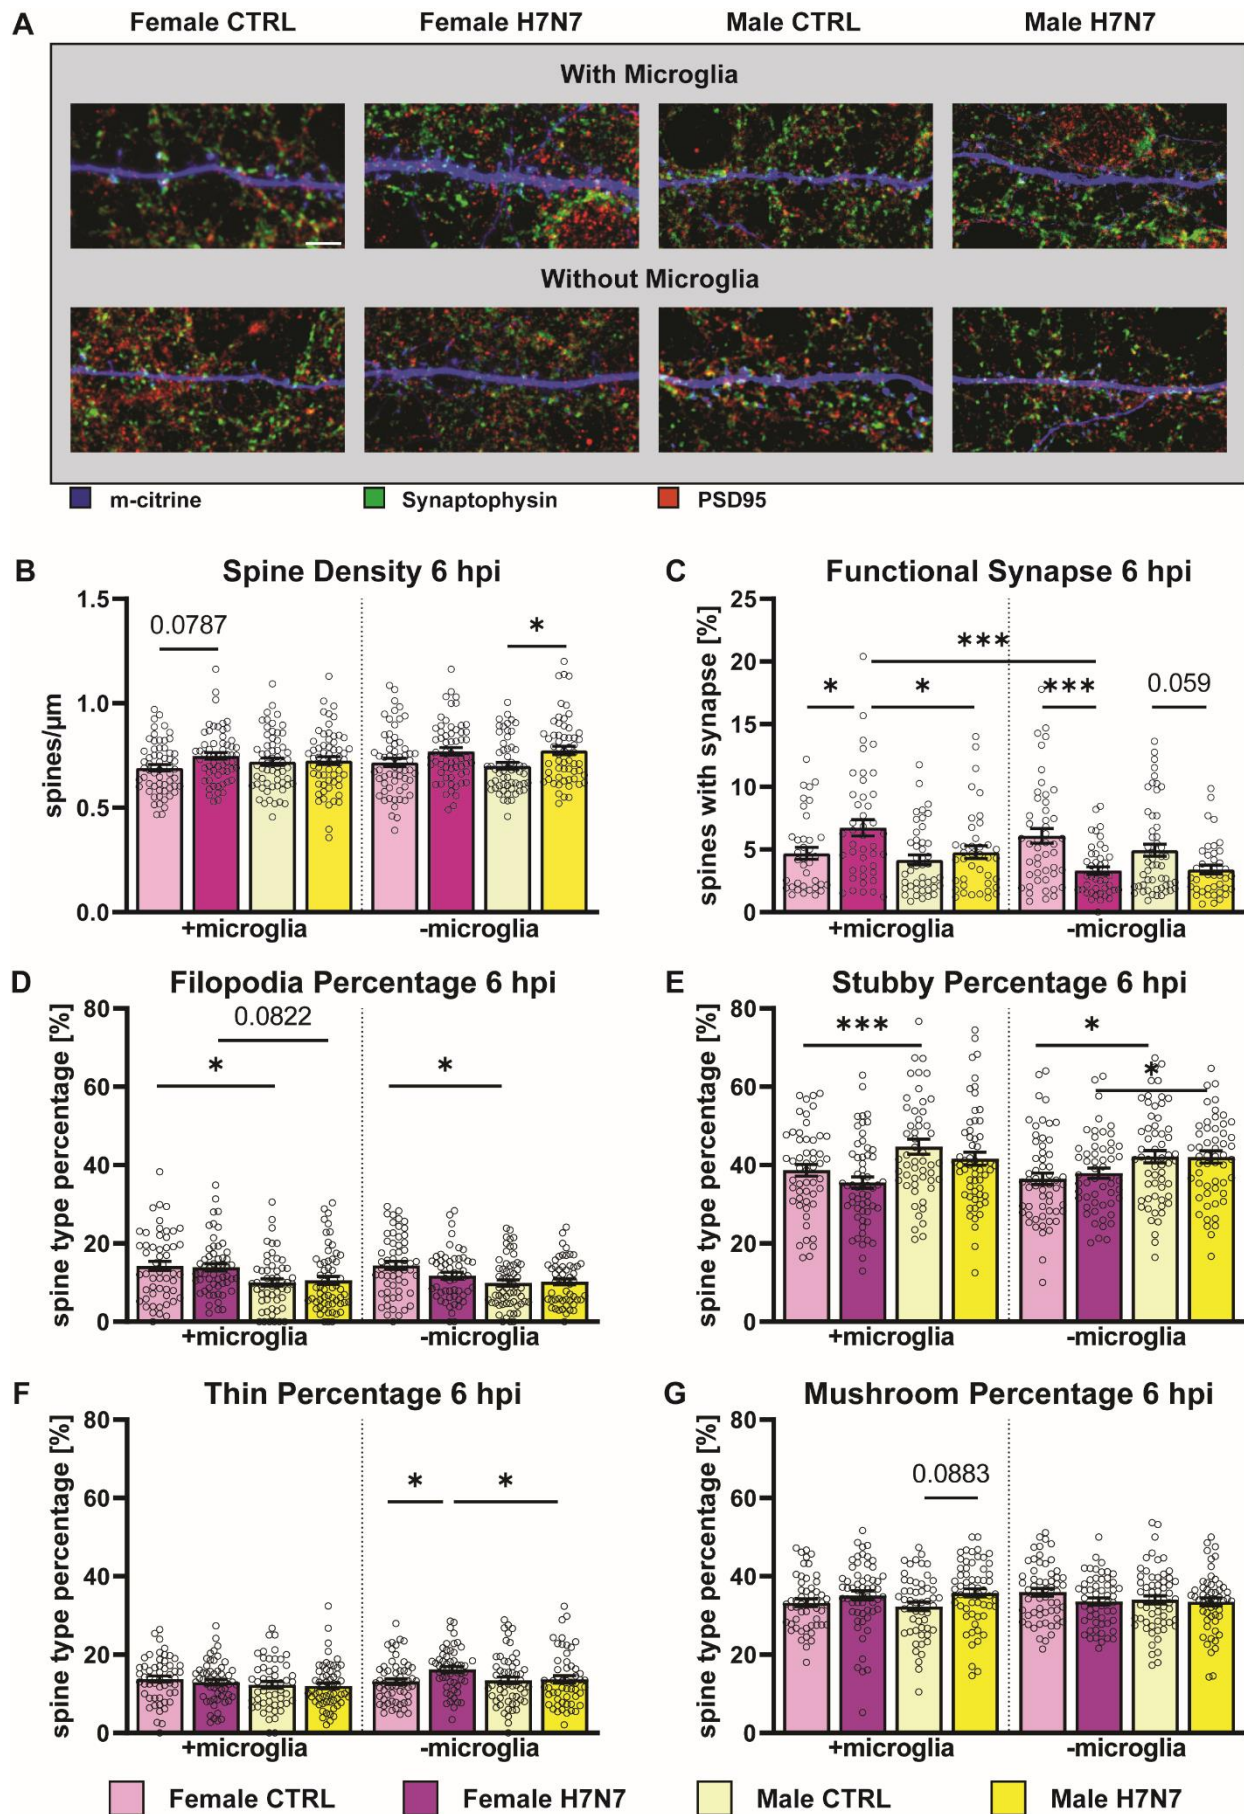

**Supplementary Figure 4.** Numerical and morphological changes in dendritic spine as well as changes in number of functional synapses upon viral infection can lead to detrimental neurological consequences. (A) Example images displaying dendritic spines (blue), presynaptic (green) and postsynaptic terminals (red). Scale bar: 5  $\mu\text{m}$ . (B) Number of dendritic spines increased in female-derived cultures with microglia involvement and without microglia involvement in male-derived cultures at 6 hpi. (C) Number of functional synapses increased in female-derived cultures in a microglia-dependent manner and decreased without microglia presence. In male-derived cultures, a decrease in functional synapses was seen in microglia absence. Morphology of dendritic spines can indicate their functional status. (D) A higher filopodia type frequency was seen in female-derived cultures compared to male-derived cultures independent of microglia presence. (E) A lower stubby spine percentage was observed in female-derived cultures compared to male-derived cultures independent of microglia presence. (F) An increase in the thin spine percentage was only seen in female-derived cultures without microglia involvement 6 hpi. (G) Proportion of mushroom type spines increased only in male-derived cultures with microglia presence at 6 hpi. Number of experiments,  $N = 3$ ,  $n = 20$  images per group and cell preparation round. Data are presented as mean  $\pm$  SEM and were analyzed by two-way ANOVA followed by post hoc Tukey test. \* $p < 0.05$  and \*\*\* $p < 0.001$ .

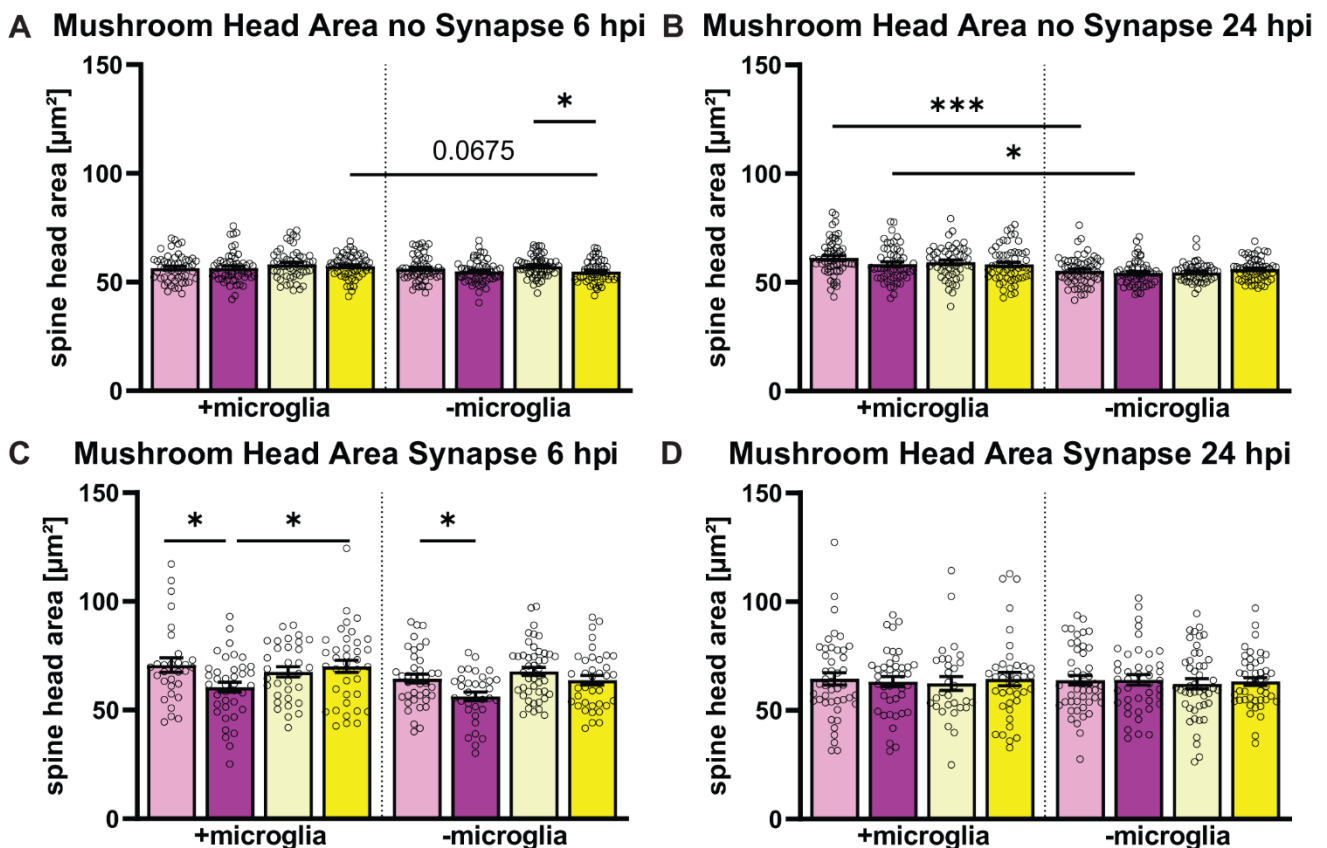

**Supplementary Figure 5.** Dendritic spine head areas can indicate the functionality and strength of the according spine as size and shape of spines can be correlated to the abundance of receptors within the cellular membrane of the PSD. (A) Mushroom-type spine head area without a synapse decreased only in male-derived cultures without microglia presence. (B) At 24 hpi, mushroom spines without a

synapse showed a greater spine head area with microglia involvement in both sexes. (C) Spine head areas of mushroom type spines with a synapse decreased in female-derived cultures independent of microglia presence at 6 hpi, whereby no change was seen in male-derived cultures. (D) At 24 hpi, no differences in mushroom spine head areas were observed. Number of experiments,  $N = 3$ ,  $n = 20$  images per group and cell preparation round. Data are presented as mean  $\pm$  SEM and were analyzed by two-way ANOVA followed by post hoc Tukey test.  $*p < 0.05$  and  $***p < 0.001$ .

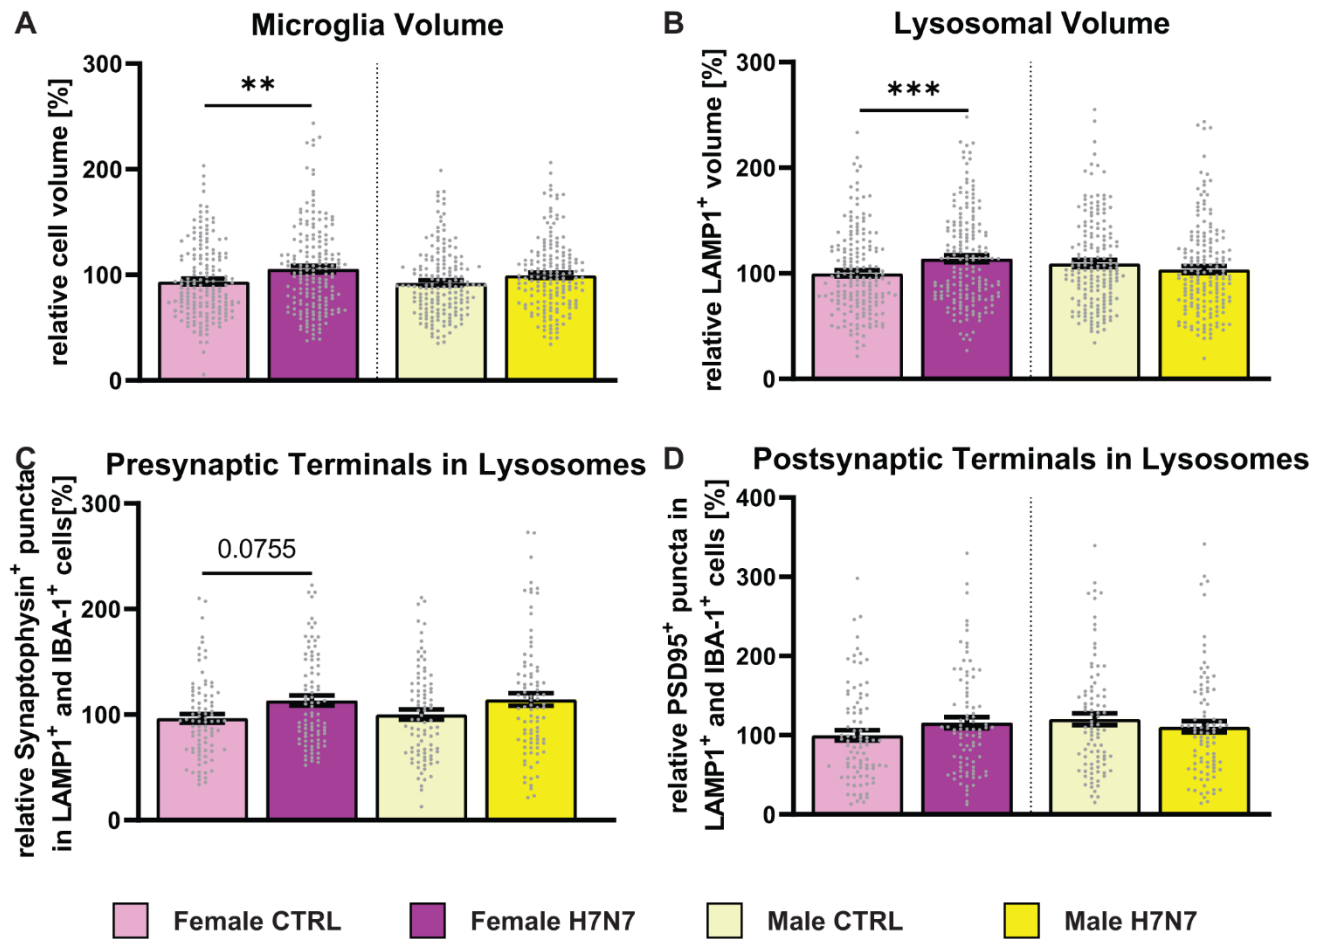

**Supplementary Figure 6.** Engulfment of excitatory synaptic terminals 6 h after infection with neurotropic IAV H7N7. (A) Increased microglia cell volume in female-derived cultures was seen at 6 hpi, whereby no volumetric changes in male-derived cultures occurred. (B) An increase in the lysosomal volume in female-derived cultures was observed as early as 6 hpi indicating an increased phagocytic activity. Number of experiments,  $N = 6$ ,  $n = 30$  cells per group and cell preparation round. (C) A trend indicating a starting increase in the engulfment of presynaptic terminals was observed in female-derived cultures 6 hpi. (D) No changes in the engulfment of postsynaptic terminals could be observed at 6 hpi. Number of experiments,  $N = 3$ ,  $n = 30$  cells per group and cell preparation round. Data are presented as mean  $\pm$  SEM and were analyzed with an ordinary two-way ANOVA with post hoc Tukey test.  $**p < 0.01$  and  $***p < 0.001$ .



**Table S1 – Statistical Information: Mean level.**

| <b>Figure</b>                          | <b>Mean level of ...</b>      |                               |                              |                               |
|----------------------------------------|-------------------------------|-------------------------------|------------------------------|-------------------------------|
| <b>Fig. 1B</b>                         | Female 6 hpi                  | Female 24 hpi                 | Male 6 hpi                   | Male 24 hpi                   |
| Total Infection Rate with microglia    | 4.877 ± 0.3547                | 12.56 ± 0.8319                | 7.976 ± 0.7515               | 12.45 ± 0.9432                |
| <b>Fig. 1C</b>                         | Female 6 hpi                  | Female 24 hpi                 | Male 6 hpi                   | Male 24 hpi                   |
| Total Infection Rate without microglia | 1.559 ± 0.1781                | 9.874 ± 0.5760                | 0.9981 ± 0.1324              | 8.130 ± 0.5442                |
| <b>Fig. 3D</b>                         | Female CTRL Amoeboid 6 h      | Female CTRL Amoeboid 24 h     | Female H7N7 Amoeboid 6 h     | Female H7N7 Amoeboid 24 h     |
| Microglia Morphology                   | 31.93 ± 2.002                 | 36.47 ± 2.551                 | 35.20 ± 3.308                | 26.83 ± 4.279                 |
|                                        | Male CTRL Amoeboid 6 h        | Male CTRL Amoeboid 24 h       | Male H7N7 Amoeboid 6 h       | Male H7N7 Amoeboid 24 h       |
|                                        | 29.48 ± 2.049                 | 26.72 ± 2.424                 | 36.93 ± 3.287                | 38.66 ± 4.121                 |
|                                        | Female CTRL Intermediate 6 h  | Female CTRL Intermediate 24 h | Female H7N7 Intermediate 6 h | Female H7N7 Intermediate 24 h |
|                                        | 51.90 ± 1.574                 | 46.50 ± 2.878                 | 38.24 ± 2.822                | 39.29 ± 4.802                 |
|                                        | Male CTRL Intermediate 6 h    | Male CTRL Intermediate 24 h   | Male H7N7 Intermediate 6 h   | Male H7N7 Intermediate 24 h   |
|                                        | 43.41 ± 2.710                 | 53.15 ± 2.780                 | 29.43 ± 2.712                | 27.84 ± 3.312                 |
|                                        | Female CTRL Ramified 6 h      | Female CTRL Ramified 24 h     | Female H7N7 Ramified 6 h     | Female H7N7 Ramified 24 h     |
|                                        | 16.18 ± 2.024                 | 13.70 ± 1.835                 | 23.23 ± 2.659                | 30.55 ± 4.975                 |
|                                        | Male CTRL Ramified 6 h        | Male CTRL Ramified 24 h       | Male H7N7 Ramified 6 h       | Male H7N7 Ramified 24 h       |
|                                        | 27.11 ± 2.704                 | 18.64 ± 1.491                 | 26.98 ± 2.897                | 33.50 ± 4.326                 |
| <b>Supplementary Fig. 4B</b>           | Female CTRL with microglia    | Female H7N7 with microglia    | Male CTRL with microglia     | Male H7N7 with microglia      |
| Spine Density 6 h                      | 0.6910 ± 0.01577              | 0.7479 ± 0.01620              | 0.7209 ± 0.01767             | 0.7259 ± 0.01895              |
|                                        | Female CTRL without microglia | Female H7N7 without microglia | Male CTRL without microglia  | Male H7N7 without microglia   |
|                                        | 0.7173 ± 0.02008              | 0.7697 ± 0.01843              | 0.7004 ± 0.01662             | 0.7745 ± 0.02022              |
| <b>Fig. 5B</b>                         | Female CTRL with microglia    | Female H7N7 with microglia    | Male CTRL with microglia     | Male H7N7 with microglia      |
| Spine Density 24 h                     | 0.6780 ± 0.01807              | 0.7407 ± 0.01955              | 0.6553 ± 0.01811             | 0.6842 ± 0.02113              |
|                                        | Female CTRL without microglia | Female H7N7 without microglia | Male CTRL without microglia  | Male H7N7 without microglia   |
|                                        | 0.7257 ± 0.02251              | 0.8063 ± 0.02269              | 0.7509 ± 0.02268             | 0.8017 ± 0.02520              |
| <b>Supplementary Fig. 4C</b>           | Female CTRL with microglia    | Female H7N7 with microglia    | Male CTRL with microglia     | Male H7N7 with microglia      |
| Functional Synapse 6 h                 | 4.698 ± 0.4871                | 6.732 ± 0.6567                | 4.185 ± 0.3980               | 4.789 ± 0.5130                |
|                                        | Female CTRL without microglia | Female H7N7 without microglia | Male CTRL without microglia  | Male H7N7 without microglia   |
|                                        | 6.092 ± 0.5885                | 3.314 ± 0.3040                | 4.948 ± 0.4855               | 3.407 ± 0.3487                |
| <b>Fig. 5C</b>                         | Female CTRL with microglia    | Female H7N7 with microglia    | Male CTRL with microglia     | Male H7N7 with microglia      |
| Functional Synapse 24h                 | 4.698 ± 0.4871                | 7.397 ± 0.8007                | 5.829 ± 0.7904               | 4.923 ± 0.4976                |
|                                        | Female CTRL without microglia | Female H7N7 without microglia | Male CTRL without microglia  | Male H7N7 without microglia   |
|                                        | 6.092 ± 0.5885                | 6.648 ± 0.5682                | 5.712 ± 0.4660               | 6.794 ± 0.6957                |

**Table S2 – Statistical Information: Two-way ANOVA.**

| Figure              | Two-way ANOVA                |                              |                                 |
|---------------------|------------------------------|------------------------------|---------------------------------|
| <b>Fig. 2A</b>      | Sex+microglia                | Infection+microglia          | Sex x Infection+microglia       |
| IFN- $\beta$ 6 hpi  | F (1, 12) = 0.1029, P=0.7538 | F (1, 12) = 12.01, P=0.0047  | F (1, 12) = 0.0002929, P=0.9866 |
|                     | Sex-microglia                | Infection-microglia          | Sex x Infection-microglia       |
|                     | F (1, 12) = 2.804, P=0.1199  | F (1, 12) = 36.69, P<0.0001  | F (1, 12) = 1.791, P=0.2056     |
| <b>Fig. 2B</b>      | Sex+microglia                | Infection+microglia          | Sex x Infection+microglia       |
| IFN- $\beta$ 24 hpi | F (1, 12) = 5.024, P=0.0447  | F (1, 12) = 2.292, P=0.1559  | F (1, 12) = 5.589, P=0.0358     |
|                     | Sex-microglia                | Infection-microglia          | Sex x Infection-microglia       |
|                     | F (1, 12) = 6.457, P=0.0259  | F (1, 12) = 115.6, P<0.0001  | F (1, 12) = 6.457, P=0.0259     |
| <b>Fig 2C</b>       | Sex+microglia                | Infection+microglia          | Sex x Infection+microglia       |
| IL-6 6 hpi          | F (1, 15) = 0.2733, P=0.6087 | F (1, 15) = 8.769, P=0.0097  | F (1, 15) = 0.4062, P=0.5335    |
|                     | Sex-microglia                | Infection-microglia          | Sex x Infection-microglia       |
|                     | F (1, 16) = 1.080, P=0.3141  | F (1, 16) = 0.1455, P=0.7079 | F (1, 16) = 0.8643, P=0.3664    |
| <b>Fig 2D</b>       | Sex+microglia                | Infection+microglia          | Sex x Infection+microglia       |
| IL-6 24 hpi         | F (1, 16) = 0.1917, P=0.6674 | F (1, 16) = 16.84, P=0.0008  | F (1, 16) = 0.01151, P=0.9159   |
| <b>Fig 2E</b>       | Sex+microglia                | Infection+microglia          | Sex x Infection+microglia       |
| TNF- $\alpha$ 6 hpi | F (1, 24) = 0.3697, P=0.5489 | F (1, 24) = 17.28, P=0.0004  | F (1, 24) = 0.07263, P=0.7899   |
|                     | Sex-microglia                | Infection-microglia          | Sex x Infection-microglia       |
|                     | F (1, 23) = 0.8689, P=0.3609 | F (1, 23) = 2.647, P=0.1174  | F (1, 23) = 1.688, P=0.2068     |
| <b>Fig. 2F</b>      | Sex+microglia                | Infection+microglia          | Sex x Infection+microglia       |

|                      |                                   |                                   |                                     |
|----------------------|-----------------------------------|-----------------------------------|-------------------------------------|
| TNF- $\alpha$ 24 hpi | F (1, 16) = 0.5244, P=0.4794      | F (1, 16) = 55.48, P<0.0001       | F (1, 16) = 0.3467, P=0.5642        |
|                      | Sex-microglia                     | Infection-microglia               | Sex x Infection-microglia           |
|                      | F (1, 24) = 0.9772, P=0.3328      | F (1, 24) = 2.025, P=0.1676       | F (1, 24) = 0.9772, P=0.3328        |
| <b>Fig 2G</b>        | Sex+microglia                     | Infection+microglia               | Sex x Infection+microglia           |
| CCL2 6 hpi           | F (1, 21) = 7.811,<br>P=0.0109    | F (1, 21) = 90.25,<br>P<0.0001    | F (1, 21) = 20.88,<br>P=0.0002      |
|                      | Sex-microglia                     | Infection-microglia               | Sex x Infection-microglia           |
|                      | F (1, 20) = 0.004541,<br>P=0.9469 | F (1, 20) = 0.001706,<br>P=0.9675 | F (1, 20) = 0.001133,<br>P=0.9735   |
| <b>Fig 2H</b>        | Sex+microglia                     | Infection+microglia               | Sex x Infection+microglia           |
| CCL2 24 hpi          | F (1, 22) = 0.2040, P=0.6560      | F (1, 22) = 17.39,<br>P=0.0004    | F (1, 22) = 0.01549,<br>P=0.9021    |
|                      | Sex-microglia                     | Infection-microglia               | Sex x Infection-microglia           |
|                      | F (1, 9) = 0.3499,<br>P=0.5687    | F (1, 9) = 1.200,<br>P=0.3018     | F (1, 9) = 0.1301,<br>P=0.7266      |
| <b>Fig. 2I</b>       | Sex+microglia                     | Infection+microglia               | Sex x Infection+microglia           |
| CCL5 6 hpi           | F (1, 12) = 3.505,<br>P=0.0857    | F (1, 12) = 110.1,<br>P<0.0001    | F (1, 12) = 6.947,<br>P=0.0217      |
|                      | Sex-microglia                     | Infection-microglia               | Sex x Infection-microglia           |
|                      | F (1, 11) = 2.246,<br>P=0.1621    | F (1, 11) = 2.246,<br>P=0.1621    | F (1, 11) = 2.246,<br>P=0.1621      |
| <b>Fig. 2J</b>       | Sex+microglia                     | Infection+microglia               | Sex x Infection+microglia           |
| CCL5 24 hpi          | F (1, 12) = 8.477,<br>P=0.0130    | F (1, 12) = 332.9,<br>P<0.0001    | F (1, 12) = 12.57,<br>P=0.0040      |
| <b>Fig. 4B</b>       | Sex <sub>amoeboid</sub>           | Infection <sub>amoeboid</sub>     | Sex x Infection <sub>amoeboid</sub> |
| IBA1 6 hpi           | F (1, 112) = 0.07276,<br>P=0.7879 | F (1, 112) = 0.02607,<br>P=0.8720 | F (1, 112) = 0.5665,<br>P=0.4532    |
|                      | Sex <sub>ramified</sub>           | Infection <sub>ramified</sub>     | Sex x Infection <sub>ramified</sub> |
|                      | F (1, 107) = 1.784,<br>P=0.1846   | F (1, 107) = 0.5969,<br>P=0.4414  | F (1, 107) = 0.1603,<br>P=0.6897    |
| <b>Fig. 4C</b>       | Sex <sub>amoeboid</sub>           | Infection <sub>amoeboid</sub>     | Sex x Infection <sub>amoeboid</sub> |

# Supplementary Material

|                              |                                        |                                          |                                         |
|------------------------------|----------------------------------------|------------------------------------------|-----------------------------------------|
| IBA1 24 hpi                  | $F(1, 100) = 1.335$ ,<br>$P = 0.2507$  | $F(1, 100) = 1.708$ ,<br>$P = 0.1943$    | $F(1, 100) = 13.34$ ,<br>$P = 0.0004$   |
|                              | Sex <sub>ramified</sub>                | Infection <sub>ramified</sub>            | Sex x Infection <sub>ramified</sub>     |
|                              | $F(1, 86) = 8.615$ ,<br>$P = 0.0043$   | $F(1, 86) = 0.006407$ ,<br>$P = 0.9364$  | $F(1, 86) = 16.24$ ,<br>$P = 0.0001$    |
| <b>Fig. 4D</b>               | Sex <sub>amoeboid</sub>                | Infection <sub>amoeboid</sub>            | Sex x Infection <sub>amoeboid</sub>     |
| CD68 6 hpi                   | $F(1, 113) = 0.5926$ ,<br>$P = 0.4430$ | $F(1, 113) = 1.059$ ,<br>$P = 0.3057$    | $F(1, 113) = 0.02659$ ,<br>$P = 0.8708$ |
|                              | Sex <sub>ramified</sub>                | Infection <sub>ramified</sub>            | Sex x Infection <sub>ramified</sub>     |
|                              | $F(1, 103) = 2.139$ ,<br>$P = 0.1466$  | $F(1, 103) = 0.002452$ ,<br>$P = 0.9606$ | $F(1, 103) = 0.04393$ ,<br>$P = 0.8344$ |
| <b>Fig. 4E</b>               | Sex <sub>amoeboid</sub>                | Infection <sub>amoeboid</sub>            | Sex x Infection <sub>amoeboid</sub>     |
| CD68 24 hpi                  | $F(1, 99) = 2.581$ ,<br>$P = 0.1113$   | $F(1, 99) = 20.23$ ,<br>$P < 0.0001$     | $F(1, 99) = 0.8234$ ,<br>$P = 0.3664$   |
|                              | Sex <sub>ramified</sub>                | Infection <sub>ramified</sub>            | Sex x Infection <sub>ramified</sub>     |
|                              | $F(1, 87) = 6.647$ ,<br>$P = 0.0116$   | $F(1, 87) = 3.220$ ,<br>$P = 0.0762$     | $F(1, 87) = 4.493$ ,<br>$P = 0.0369$    |
| <b>Fig. 4F</b>               | Sex                                    | Infection                                | Sex x Infection                         |
| Microglia cell volume 24 hpi | $F(1, 716) = 0.5384$ ,<br>$P = 0.4633$ | $F(1, 716) = 8.967$ ,<br>$P = 0.0028$    | $F(1, 716) = 0.04751$ ,<br>$P = 0.8275$ |
| <b>Fig. 4G</b>               | Sex                                    | Infection                                | Sex x Infection                         |
| Lysosomal volume 24 hpi      | $F(1, 705) = 0.2571$ ,<br>$P = 0.6123$ | $F(1, 705) = 49.71$ ,<br>$P < 0.0001$    | $F(1, 705) = 0.7815$ ,<br>$P = 0.3770$  |
